# Supplementary material for: Reversible stimuli-responsive luminescence of bimetallic cuprous complexes based on NH-deprotonated 3-(2′-pyridyl)pyrazole
Source: Royal Society of Chemistry journal article supplement (doi:10.1039/d1tc03864h), 2021-01-01
Supplement: d1tc03864h1.pdf [file d1tc03864h1.pdf]

*Electronic Supplementary Information (ESI)*

**Reversible stimuli-responsive luminescence of bimetallic cuprous complexes based on NH-deprotonated 3-(2'-pyridyl)pyrazole**

Yang Tong,<sup>‡a</sup> Xing-Wei Chen,<sup>‡a</sup> Li-Hua He, Jing-Lin Chen,<sup>\*ab</sup> Sui-Jun Liu,<sup>a</sup> and He-Rui Wen<sup>a</sup>

<sup>a</sup> *Department of Materials, Metallurgy and Chemistry, Jiangxi University of Science and Technology, Ganzhou 341000, P.R. China*

<sup>b</sup> *State Key Laboratory of Structural Chemistry, Fujian Institute of Research on the Structure of Matter, Chinese Academy of Sciences, Fuzhou 350002, P.R. China*

---

\*Authors to whom correspondence should be addressed.

E-mail: gzchenjinglin@126.com (J.-L. Chen)

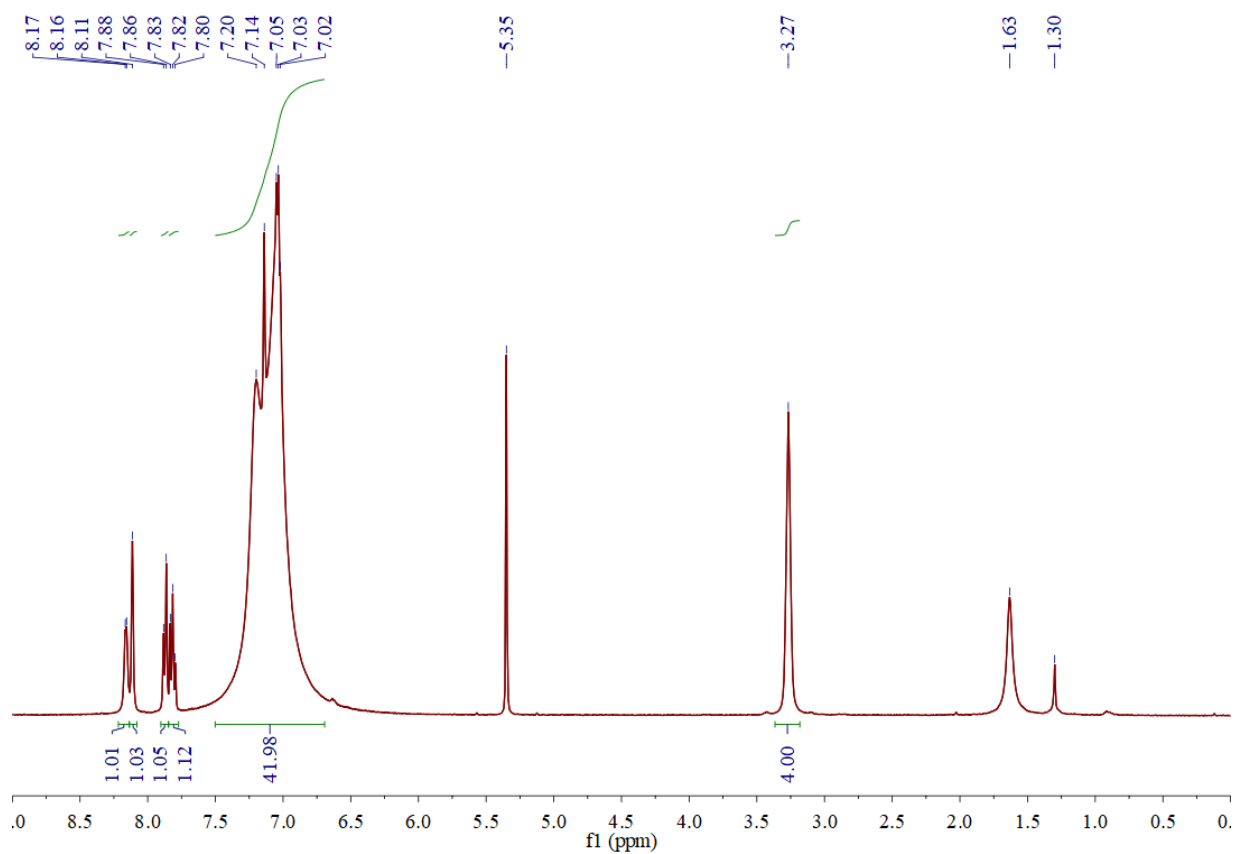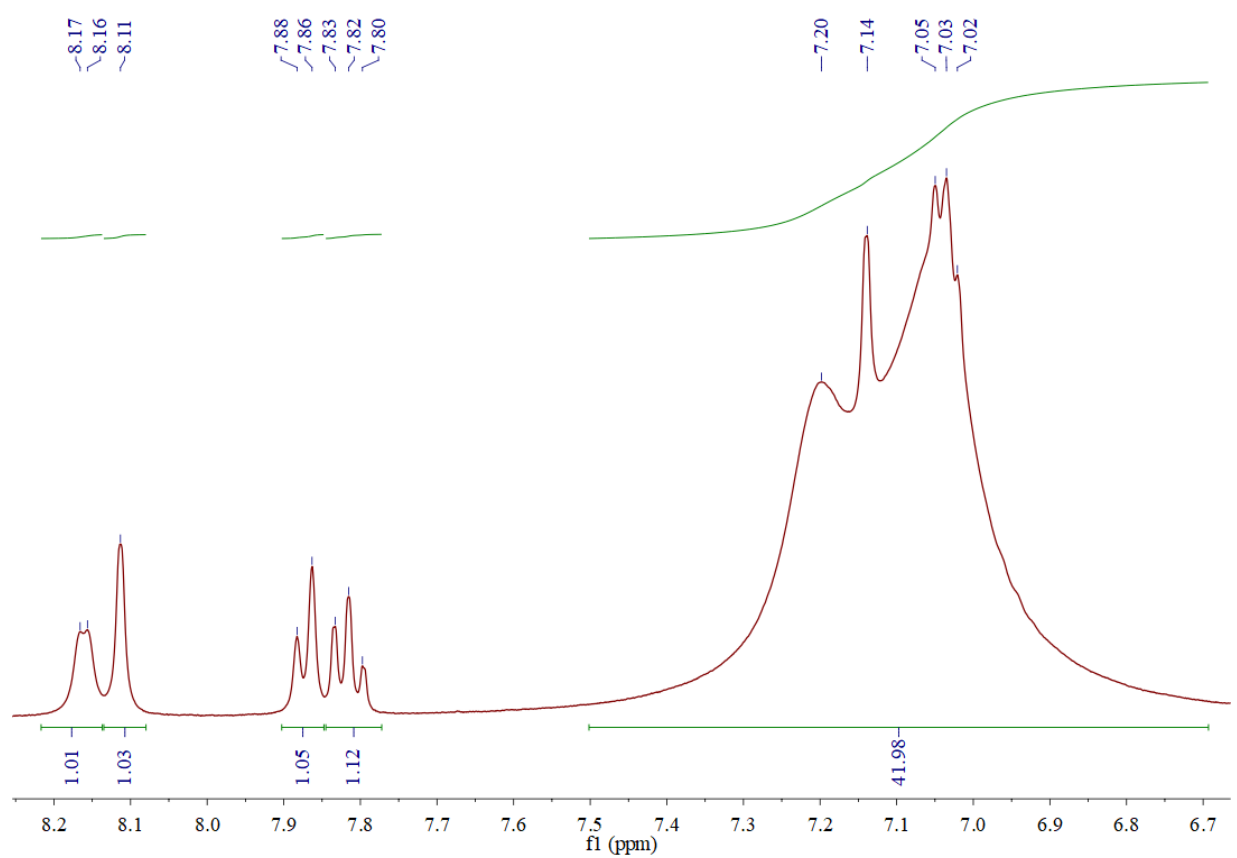

**Fig. S1**  $^1\text{H}$  NMR spectra of **1** in  $\text{CD}_2\text{Cl}_2$ .

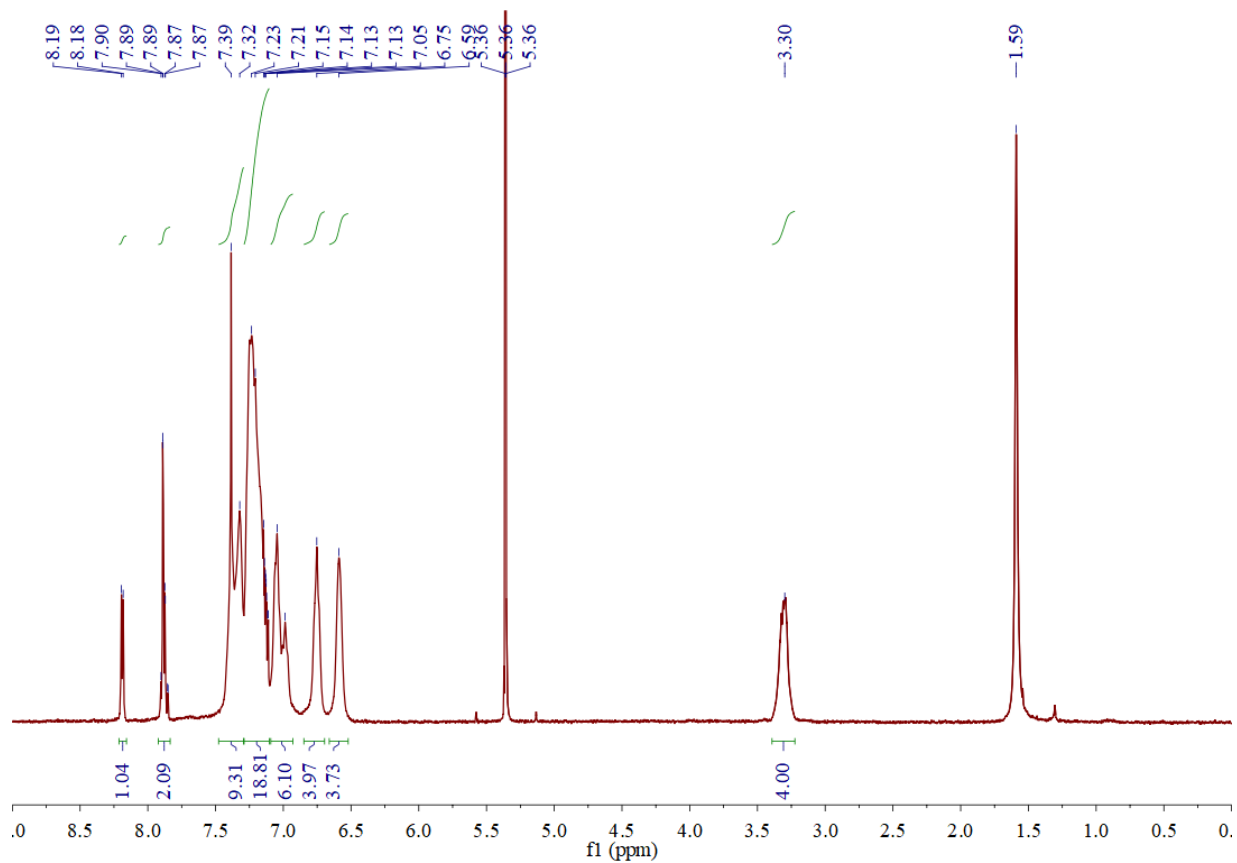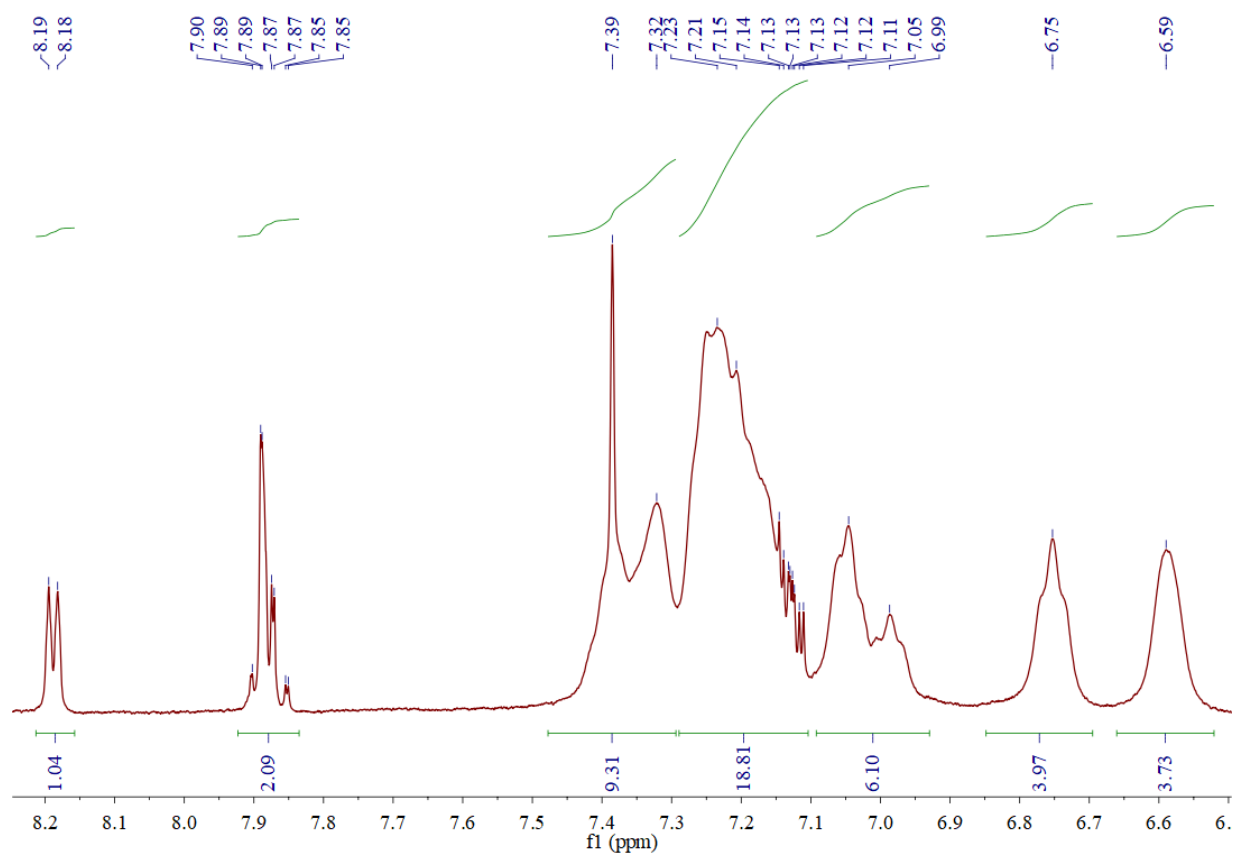

**Fig. S2**  $^1\text{H}$  NMR spectra of **2** in  $\text{CD}_2\text{Cl}_2$ .

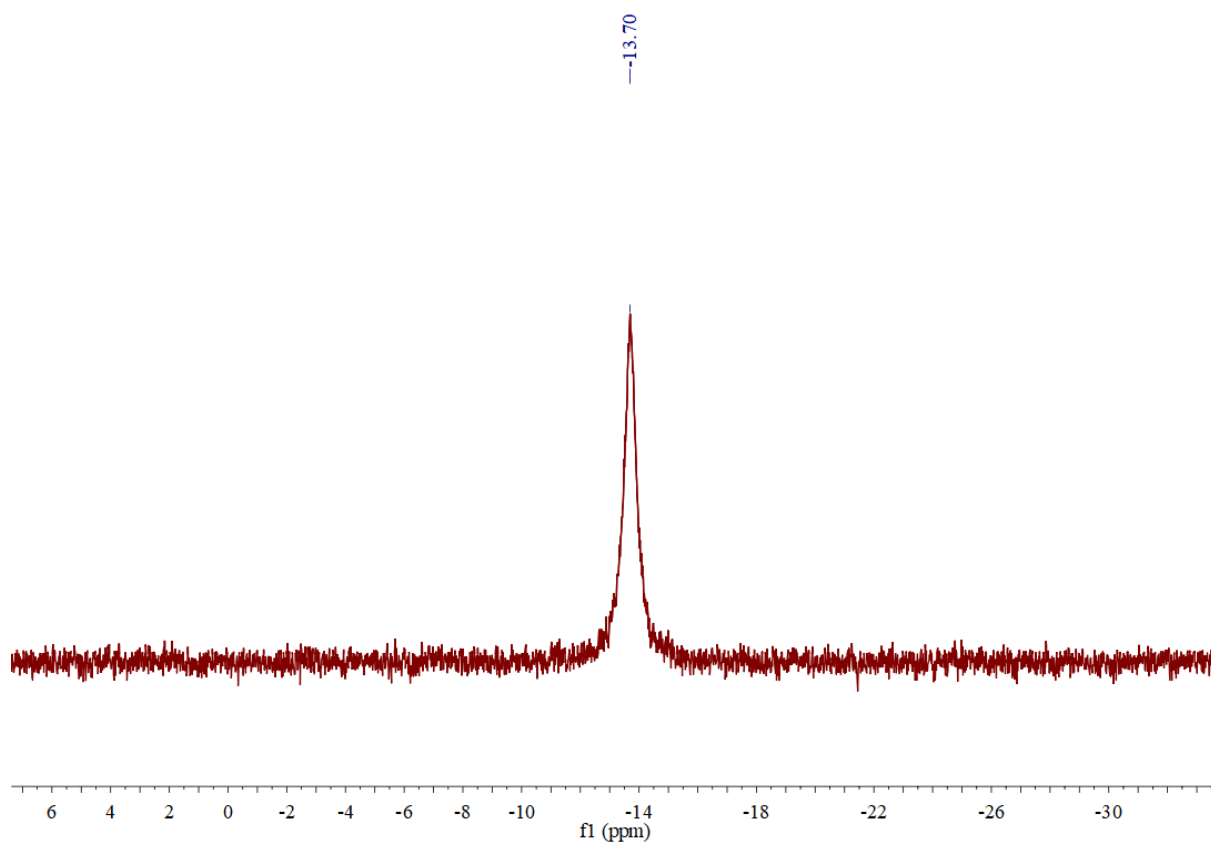

**Fig. S3**  $^{31}\text{P}$  NMR spectra of **1** in  $\text{CD}_2\text{Cl}_2$ .

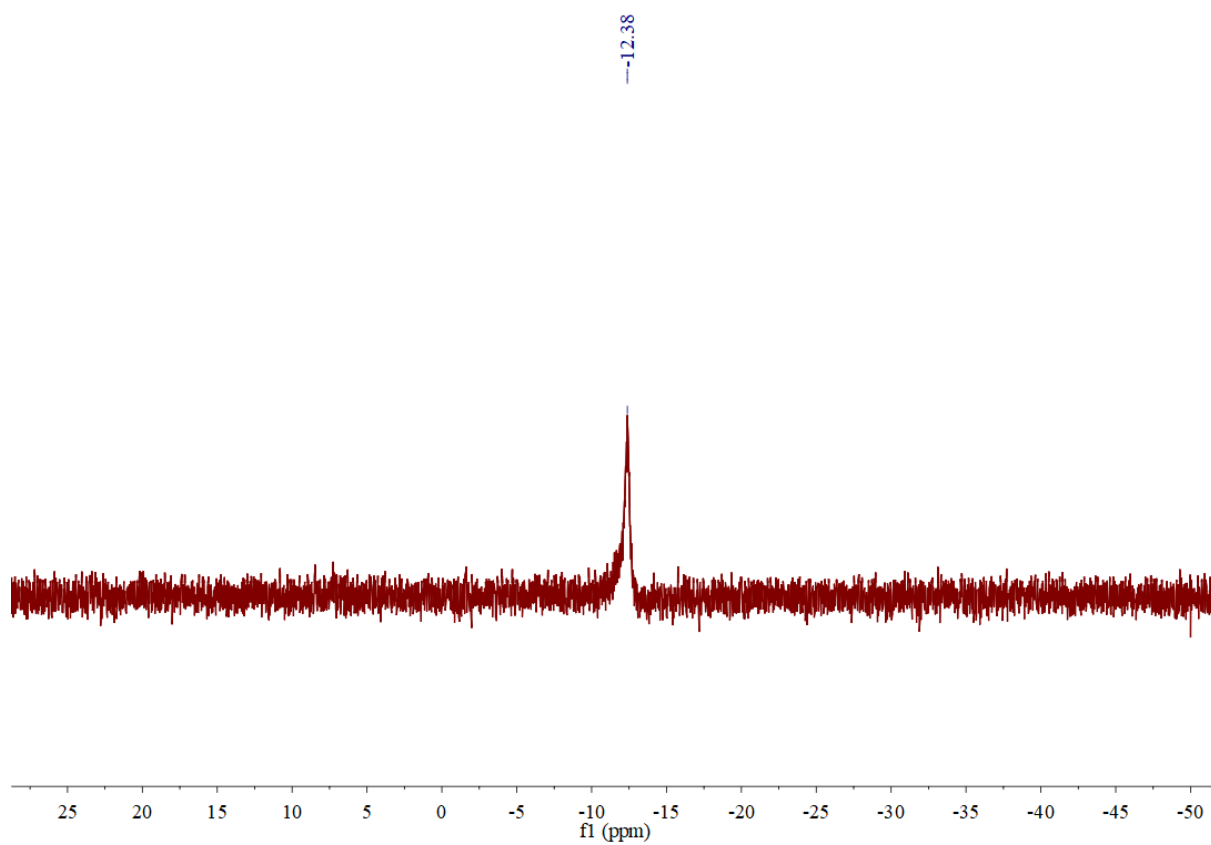

**Fig. S4**  $^{31}\text{P}$  NMR spectra of **2** in  $\text{CD}_2\text{Cl}_2$ .

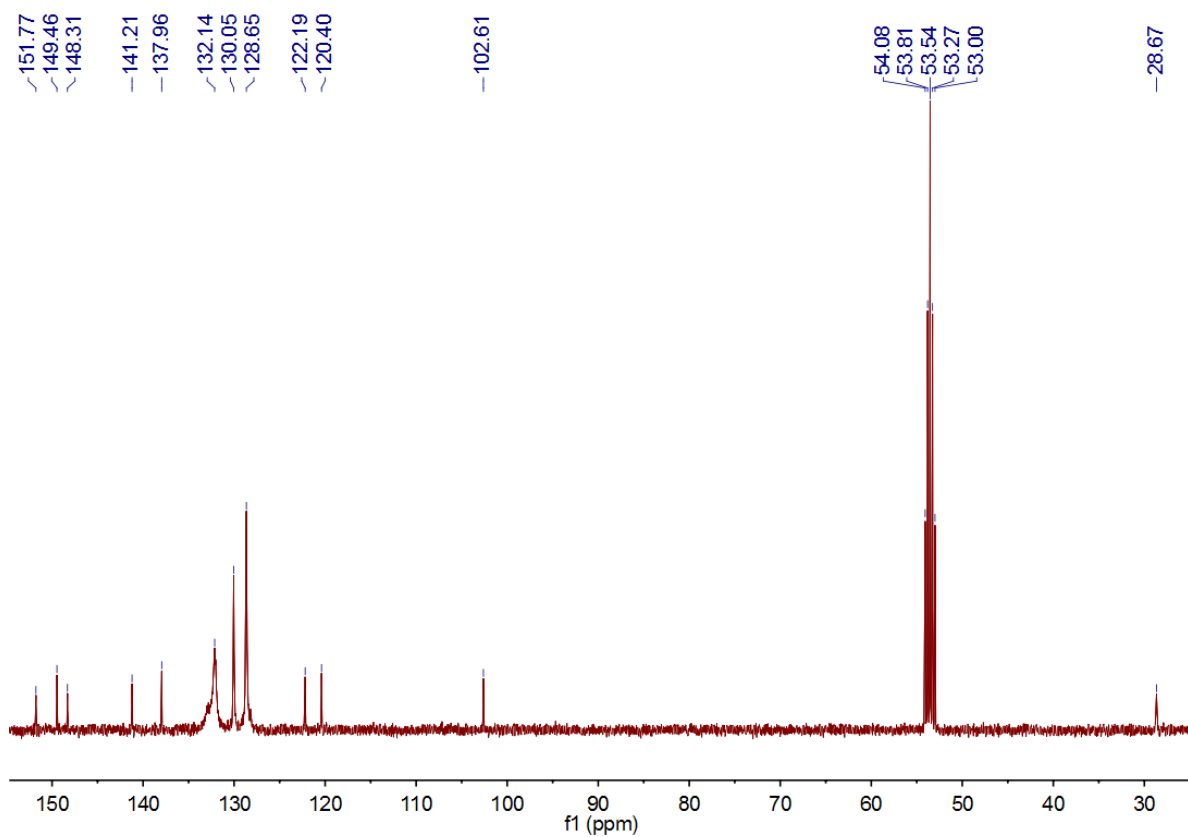

**Fig. S5**  $^{13}\text{C}$  NMR spectrum of **1** in  $\text{CD}_2\text{Cl}_2$ .

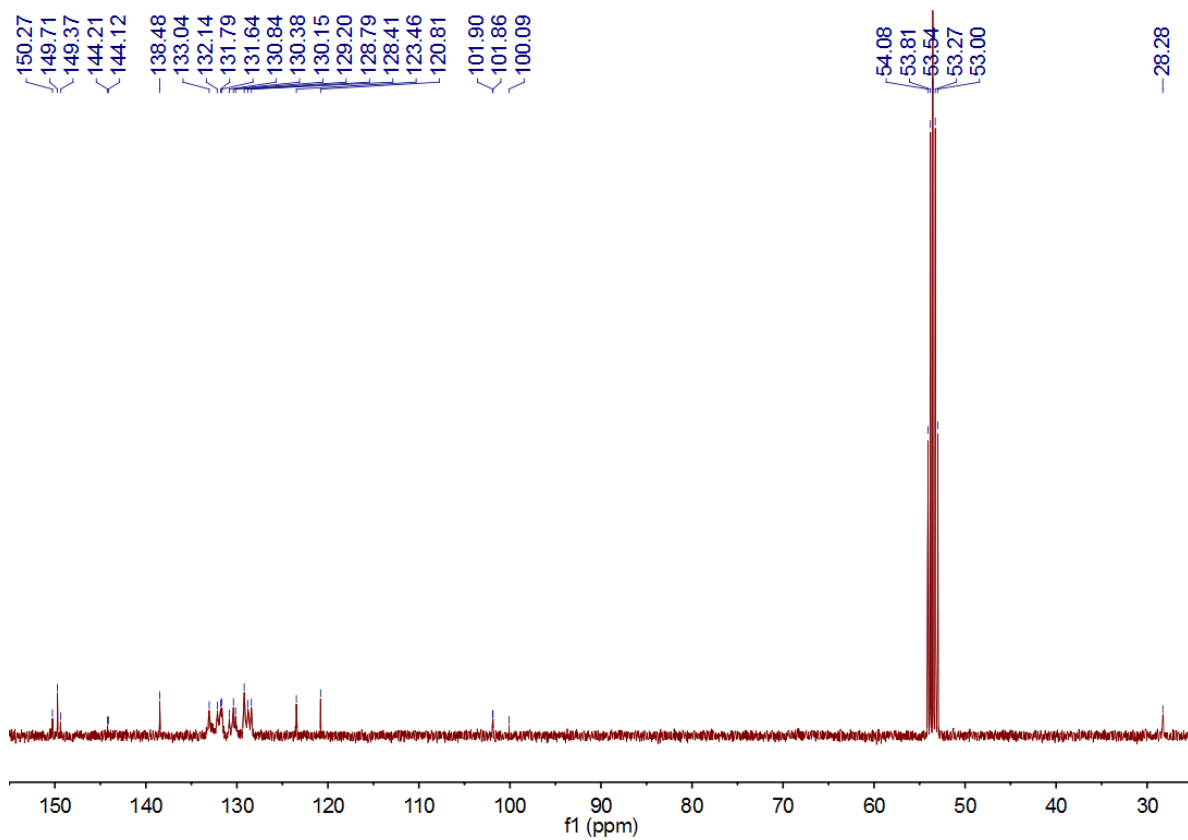

**Fig. S6**  $^{13}\text{C}$  NMR spectrum of **2** in  $\text{CD}_2\text{Cl}_2$ .

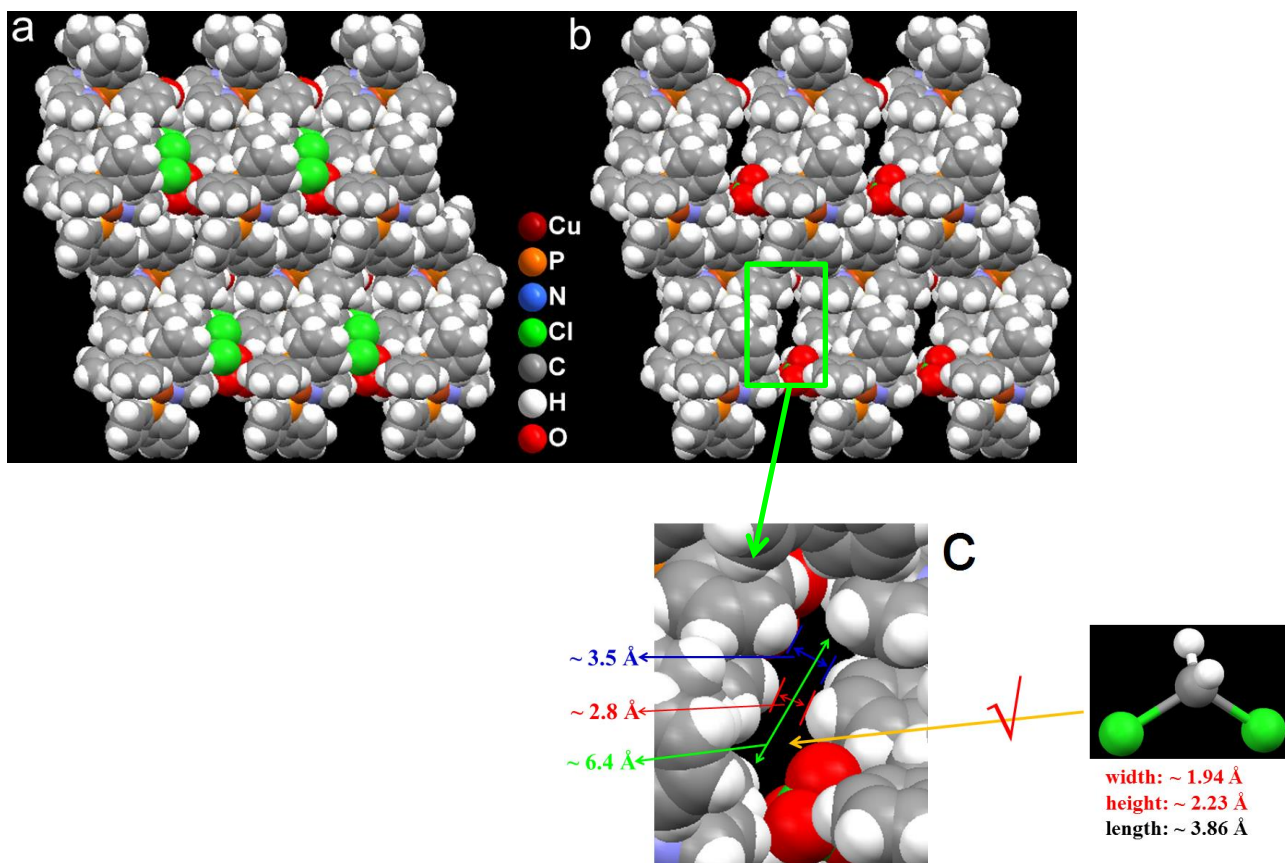

**Fig. S7** Packing diagram of **1** along the *a* axis (a) with and (b) without CH<sub>2</sub>Cl<sub>2</sub> solvate molecules; (c) the zoom of the window of the pore-channel structure of **1**.

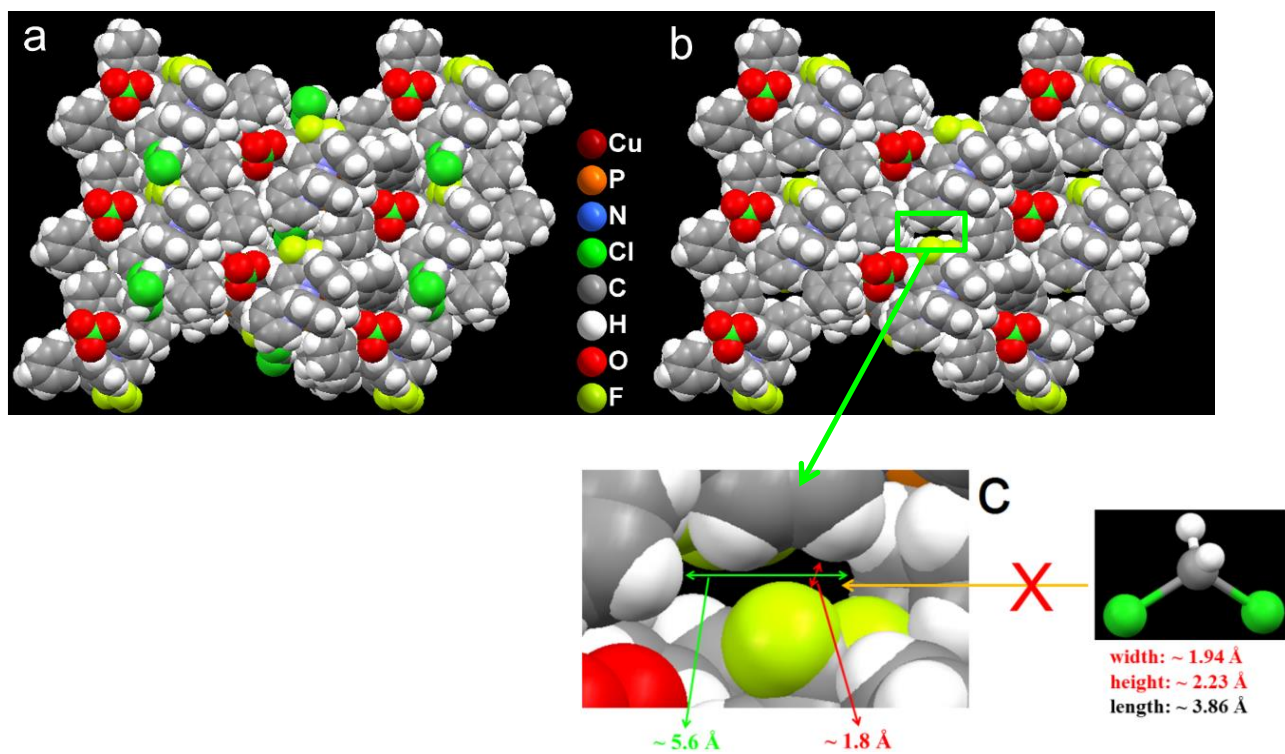

**Fig. S8** Packing diagram of **2** along the *b* axis (a) with and (b) without CH<sub>2</sub>Cl<sub>2</sub> solvate molecules; (c) the zoom of the window of the pore-channel structure of **2**.

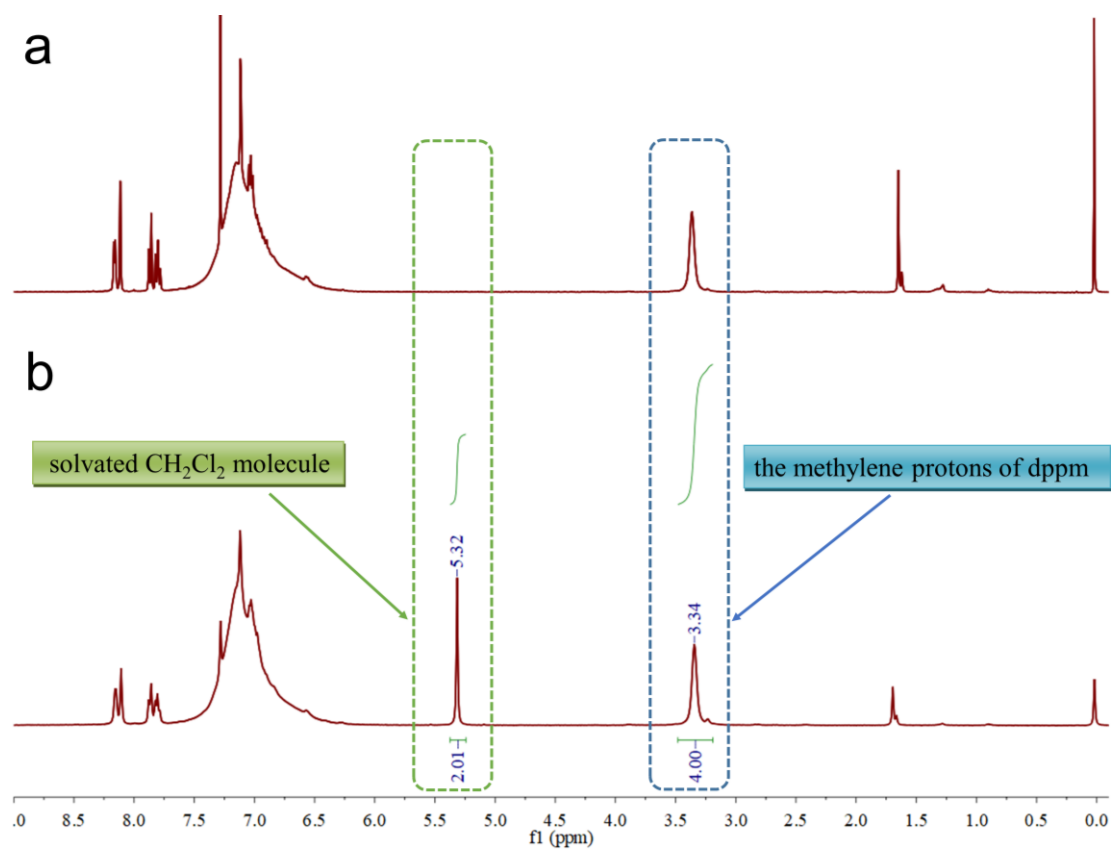

**Fig. S9**  $^1\text{H}$  NMR spectra of *desolvated 1* (a) and *crystalline 1* (b) in  $\text{CDCl}_3$ .

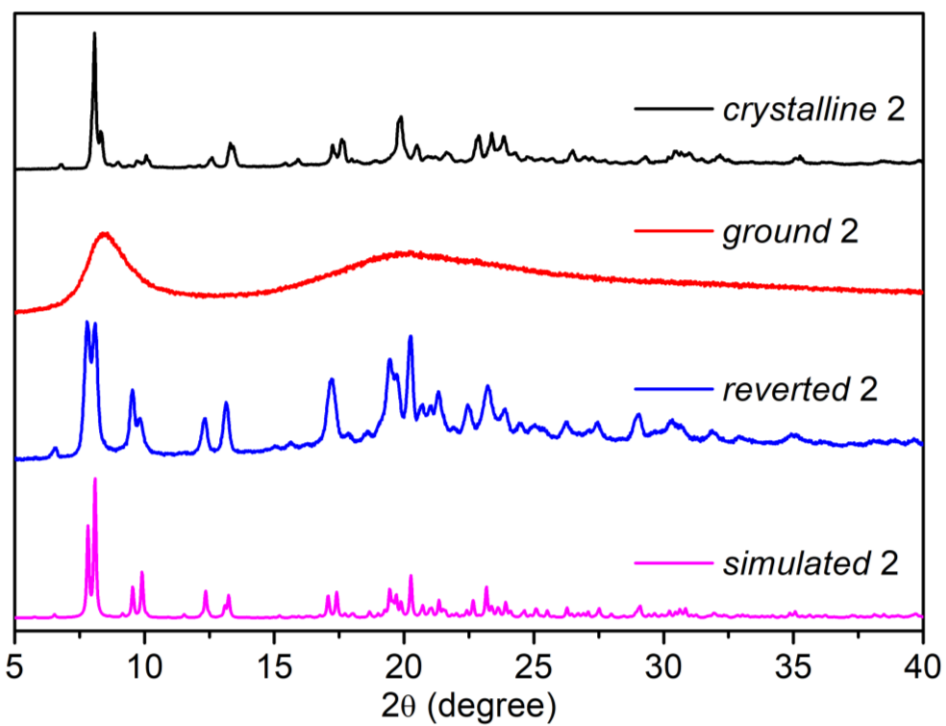

**Fig. S10** PXRD patterns of the *crystalline*, *ground*, and *reverted* samples of **2** and that simulated from single-crystal data of **2**.

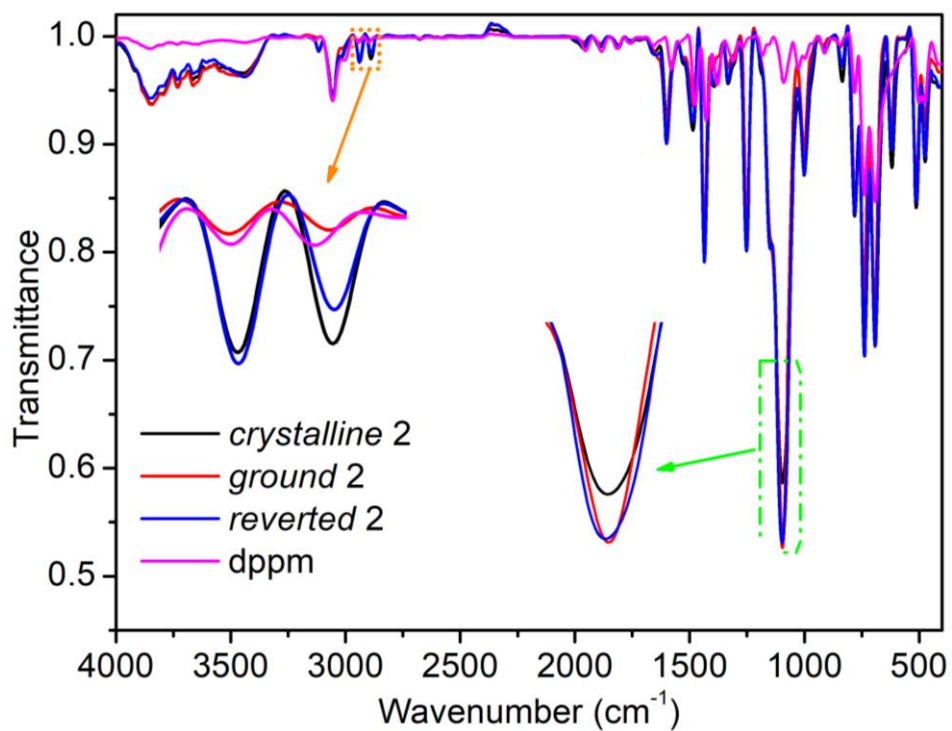

**Fig. S11** FT-IR spectra of dppm and the *crystalline*, *ground*, and *reverted* samples of **2**. Inset: the zoom of the Cl–O and methylene C–H stretching vibration absorptions.

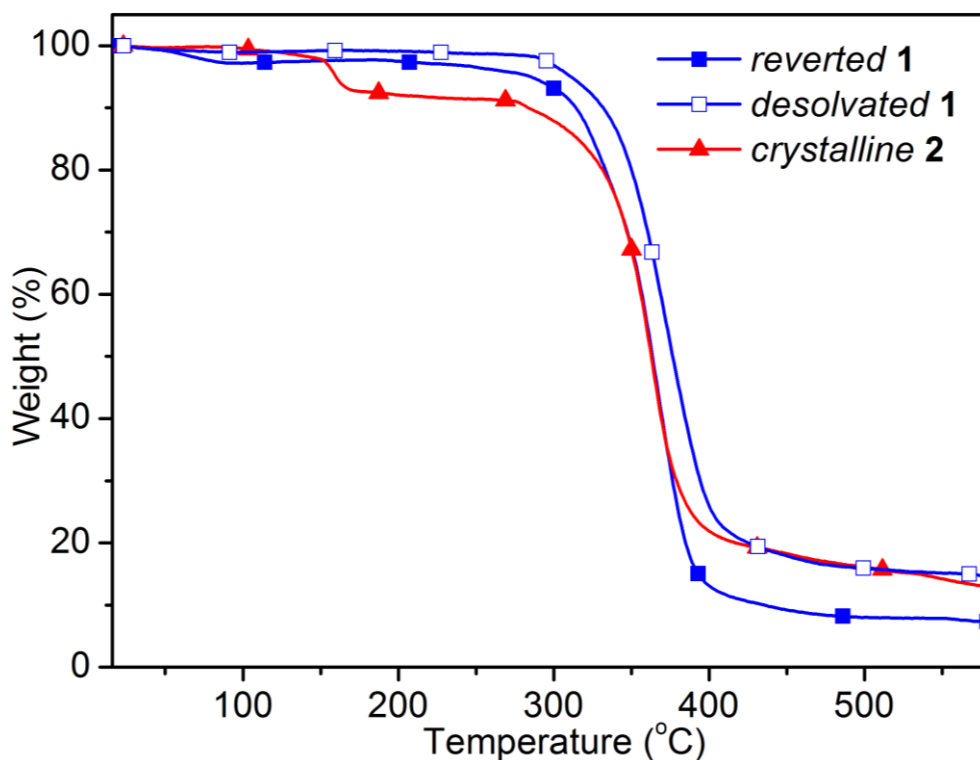

**Fig. S12** TGA curves of *desolvated 1*, *reverted 1*, and *crystalline 2*.



**Table S1.** Crystal data and structure refinement parameters of **1** and **2**

| compound                                    | <b>1</b>                                                                                                     | <b>2</b>                                                                                                                    |
|---------------------------------------------|--------------------------------------------------------------------------------------------------------------|-----------------------------------------------------------------------------------------------------------------------------|
| formula                                     | C <sub>59</sub> H <sub>52</sub> Cl <sub>3</sub> Cu <sub>2</sub> N <sub>3</sub> O <sub>4</sub> P <sub>4</sub> | C <sub>60</sub> H <sub>51</sub> Cl <sub>3</sub> Cu <sub>2</sub> F <sub>3</sub> N <sub>3</sub> O <sub>4</sub> P <sub>4</sub> |
| fw                                          | 1224.34                                                                                                      | 1292.34                                                                                                                     |
| <i>T</i> (K)                                | 293(2)                                                                                                       | 299(2)                                                                                                                      |
| crystal system                              | triclinic                                                                                                    | Monoclinic                                                                                                                  |
| space group                                 | <i>P</i> $\bar{1}$                                                                                           | <i>P</i> 2 <sub>1</sub> / <i>c</i>                                                                                          |
| <i>a</i> (Å)                                | 12.9124(7)                                                                                                   | 11.7627(6)                                                                                                                  |
| <i>b</i> (Å)                                | 14.3129(8)                                                                                                   | 18.5166(10)                                                                                                                 |
| <i>c</i> (Å)                                | 17.8368(11)                                                                                                  | 27.2950(15)                                                                                                                 |
| $\alpha$ (deg)                              | 71.683(2)                                                                                                    | 90                                                                                                                          |
| $\beta$ (deg)                               | 79.859(2)                                                                                                    | 98.1430(10)                                                                                                                 |
| $\gamma$ (deg)                              | 64.650(2)                                                                                                    | 90                                                                                                                          |
| <i>V</i> (Å <sup>3</sup> )                  | 2824.8(3)                                                                                                    | 5885.1(5)                                                                                                                   |
| <i>Z</i>                                    | 2                                                                                                            | 4                                                                                                                           |
| $\rho_{\text{calcd}}$ (g cm <sup>-3</sup> ) | 1.439                                                                                                        | 1.459                                                                                                                       |
| $\mu$ (mm <sup>-1</sup> )                   | 1.057                                                                                                        | 1.026                                                                                                                       |
| no. reflections collected                   | 43308                                                                                                        | 101096                                                                                                                      |
| no. unique reflections                      | 12857                                                                                                        | 13170                                                                                                                       |
| <i>R</i> <sub>int</sub>                     | 0.0327                                                                                                       | 0.0672                                                                                                                      |
| no. observed reflections                    | 12857                                                                                                        | 13170                                                                                                                       |
| no. parameters                              | 676                                                                                                          | 758                                                                                                                         |
| GOF on <i>F</i> <sup>2</sup>                | 1.031                                                                                                        | 1.066                                                                                                                       |
| <i>R</i> 1 [ <i>I</i> > 2σ( <i>I</i> )]     | 0.0403                                                                                                       | 0.0553                                                                                                                      |
| <i>wR</i> 2                                 | 0.0920                                                                                                       | 0.1032                                                                                                                      |

**Table S2.** Selected Bond Lengths (Å) and Angles (deg) of **1** and **2**

| compound  | <b>1</b>  | <b>2</b>   |
|-----------|-----------|------------|
| Cu1–N1    | 2.169(2)  | 2.189(3)   |
| Cu1–N2    | 1.986(2)  | 2.017(3)   |
| Cu1–P1    | 2.2514(7) | 2.2613(10) |
| Cu1–P2    | 2.2462(7) | 2.2454(10) |
| Cu2–N3    | 1.997(2)  | 2.032(3)   |
| Cu2–P3    | 2.2310(7) | 2.2426(10) |
| Cu2–P4    | 2.2426(7) | 2.2432(10) |
| N1–Cu1–N2 | 78.56(9)  | 77.38(12)  |
| N1–Cu1–P1 | 113.01(6) | 111.86(8)  |
| N1–Cu1–P2 | 114.68(6) | 113.15(8)  |
| N2–Cu1–P1 | 113.09(6) | 113.59(8)  |
| N2–Cu1–P2 | 118.84(7) | 116.25(8)  |
| P1–Cu1–P2 | 113.98(3) | 117.86(4)  |
| N3–Cu2–P3 | 116.26(7) | 118.11(9)  |
| N3–Cu2–P4 | 113.78(7) | 117.47(9)  |
| P3–Cu2–P4 | 127.50(3) | 122.69(4)  |

**Table S3.** Photophysical Data of **1** and **2**

| compound | medium                          | $\lambda_{\text{abs}}$ [nm] ( $\epsilon$ [ $\text{M}^{-1} \text{cm}^{-1}$ ]) | $\lambda_{\text{em}}$ [nm]                           | $\tau$ [ $\mu\text{s}$ ]                            | $\Phi_{\text{em}}$ [%]                            |
|----------|---------------------------------|------------------------------------------------------------------------------|------------------------------------------------------|-----------------------------------------------------|---------------------------------------------------|
| <b>1</b> | CH <sub>2</sub> Cl <sub>2</sub> | 276 (31467)                                                                  | 526                                                  | 3                                                   | 0.4                                               |
|          | solid                           |                                                                              | 461, <sup>a</sup> 508, <sup>c</sup> 472 <sup>d</sup> | 210, <sup>a</sup> 48, <sup>c</sup> 185 <sup>d</sup> | 38, <sup>a</sup> 21, <sup>c</sup> 55 <sup>d</sup> |
| <b>2</b> | CH <sub>2</sub> Cl <sub>2</sub> | 275 (39030), 313 (14248)                                                     | 527                                                  | 6                                                   | 1.1                                               |
|          | solid                           |                                                                              | 492, <sup>b</sup> 506, <sup>c</sup> 493 <sup>d</sup> | 47, <sup>b</sup> 32, <sup>c</sup> 40 <sup>d</sup>   | 88, <sup>b</sup> 28, <sup>c</sup> 81 <sup>d</sup> |

<sup>a</sup> Desolvated sample. <sup>b</sup> Crystalline sample. <sup>c</sup> Ground samples. <sup>d</sup> Reverted samples.
